# Supplementary figures and images for: Selectivity mechanism of muscarinic acetylcholine receptor antagonism through in silico investigation
Source: Royal Society of Chemistry journal article supplement (doi:10.1039/d2cp02972c), 2022-01-01

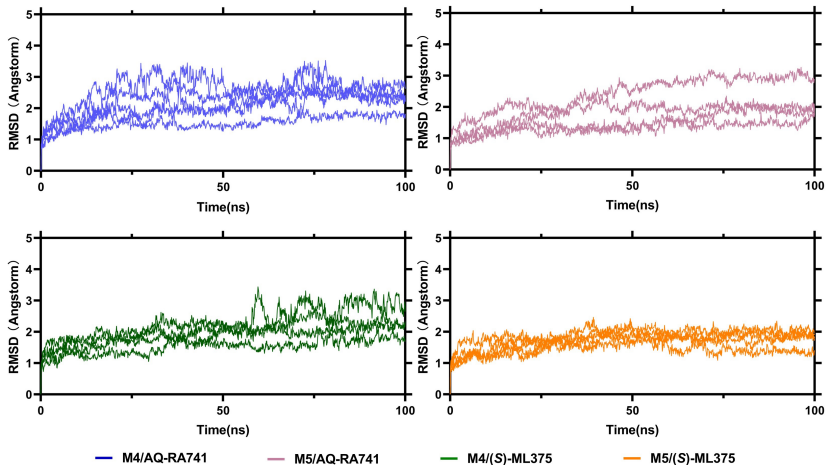

Supplement: d2cp02972c1.pdf [file d2cp02972c1.pdf]

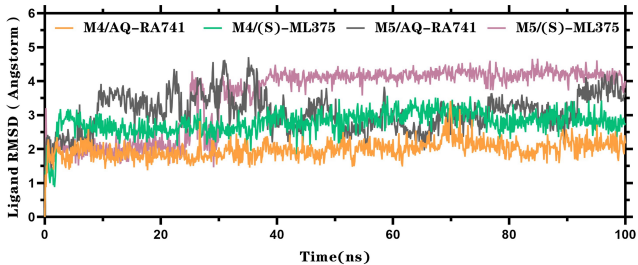

Supplement: d2cp02972c2.pdf [file d2cp02972c2.pdf]

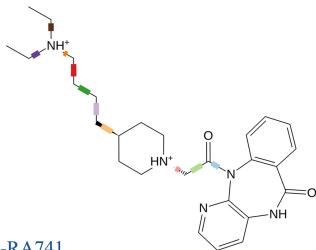

M4/AQ-RA741

M5/AQ-RA741

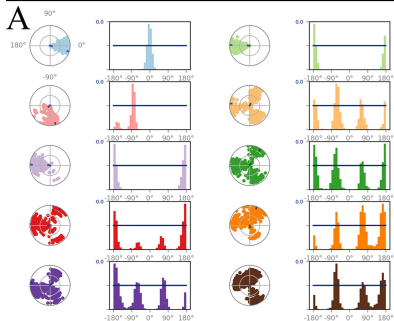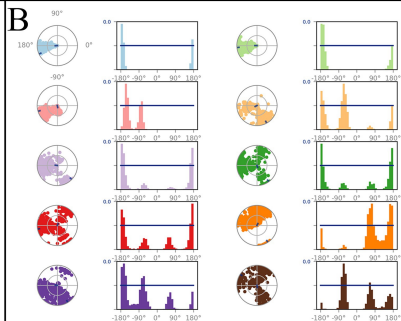

Supplement: d2cp02972c3.pdf [file d2cp02972c3.pdf]

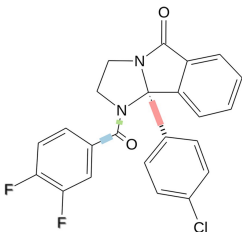

**A**

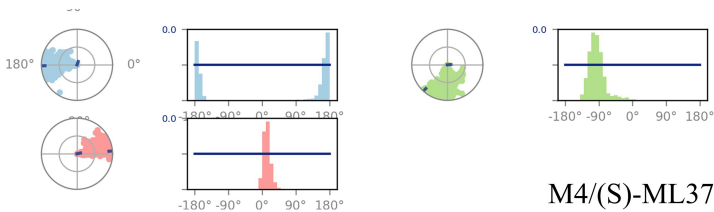

**M4/(S)-ML375**

**B**

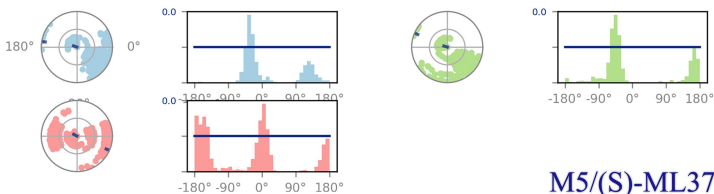

**M5/(S)-ML375**

Supplement: d2cp02972c4.pdf [file d2cp02972c4.pdf]

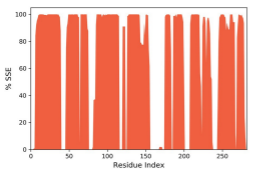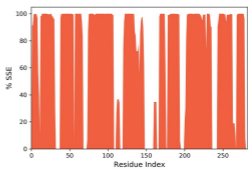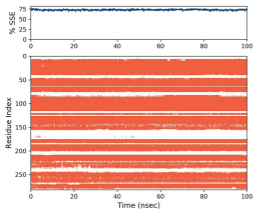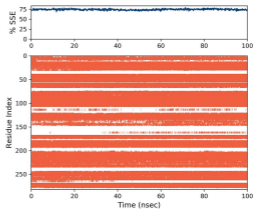

**M4/AQ-RA741**

**M5/AQ-RA741**

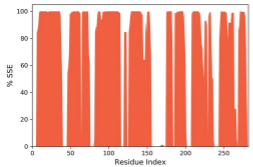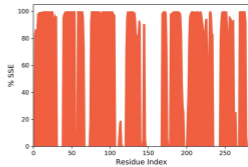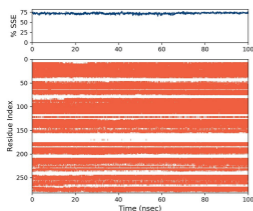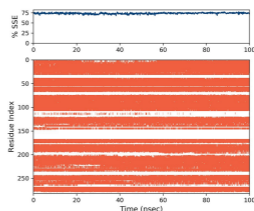

**M4/(S)-ML375**

**M5/(S)-ML375**

Supplement: d2cp02972c6.pdf [file d2cp02972c6.pdf]
